# Supplementary material
Source: PubMed Central journal article supplement (PMC3387707)
Supplement: supp_pp.112.197343_197343Supplementary_Figures.pdf [file supp_pp.112.197343_197343Supplementary_Figures.pdf]

# Supplementary Figure S1 (1)

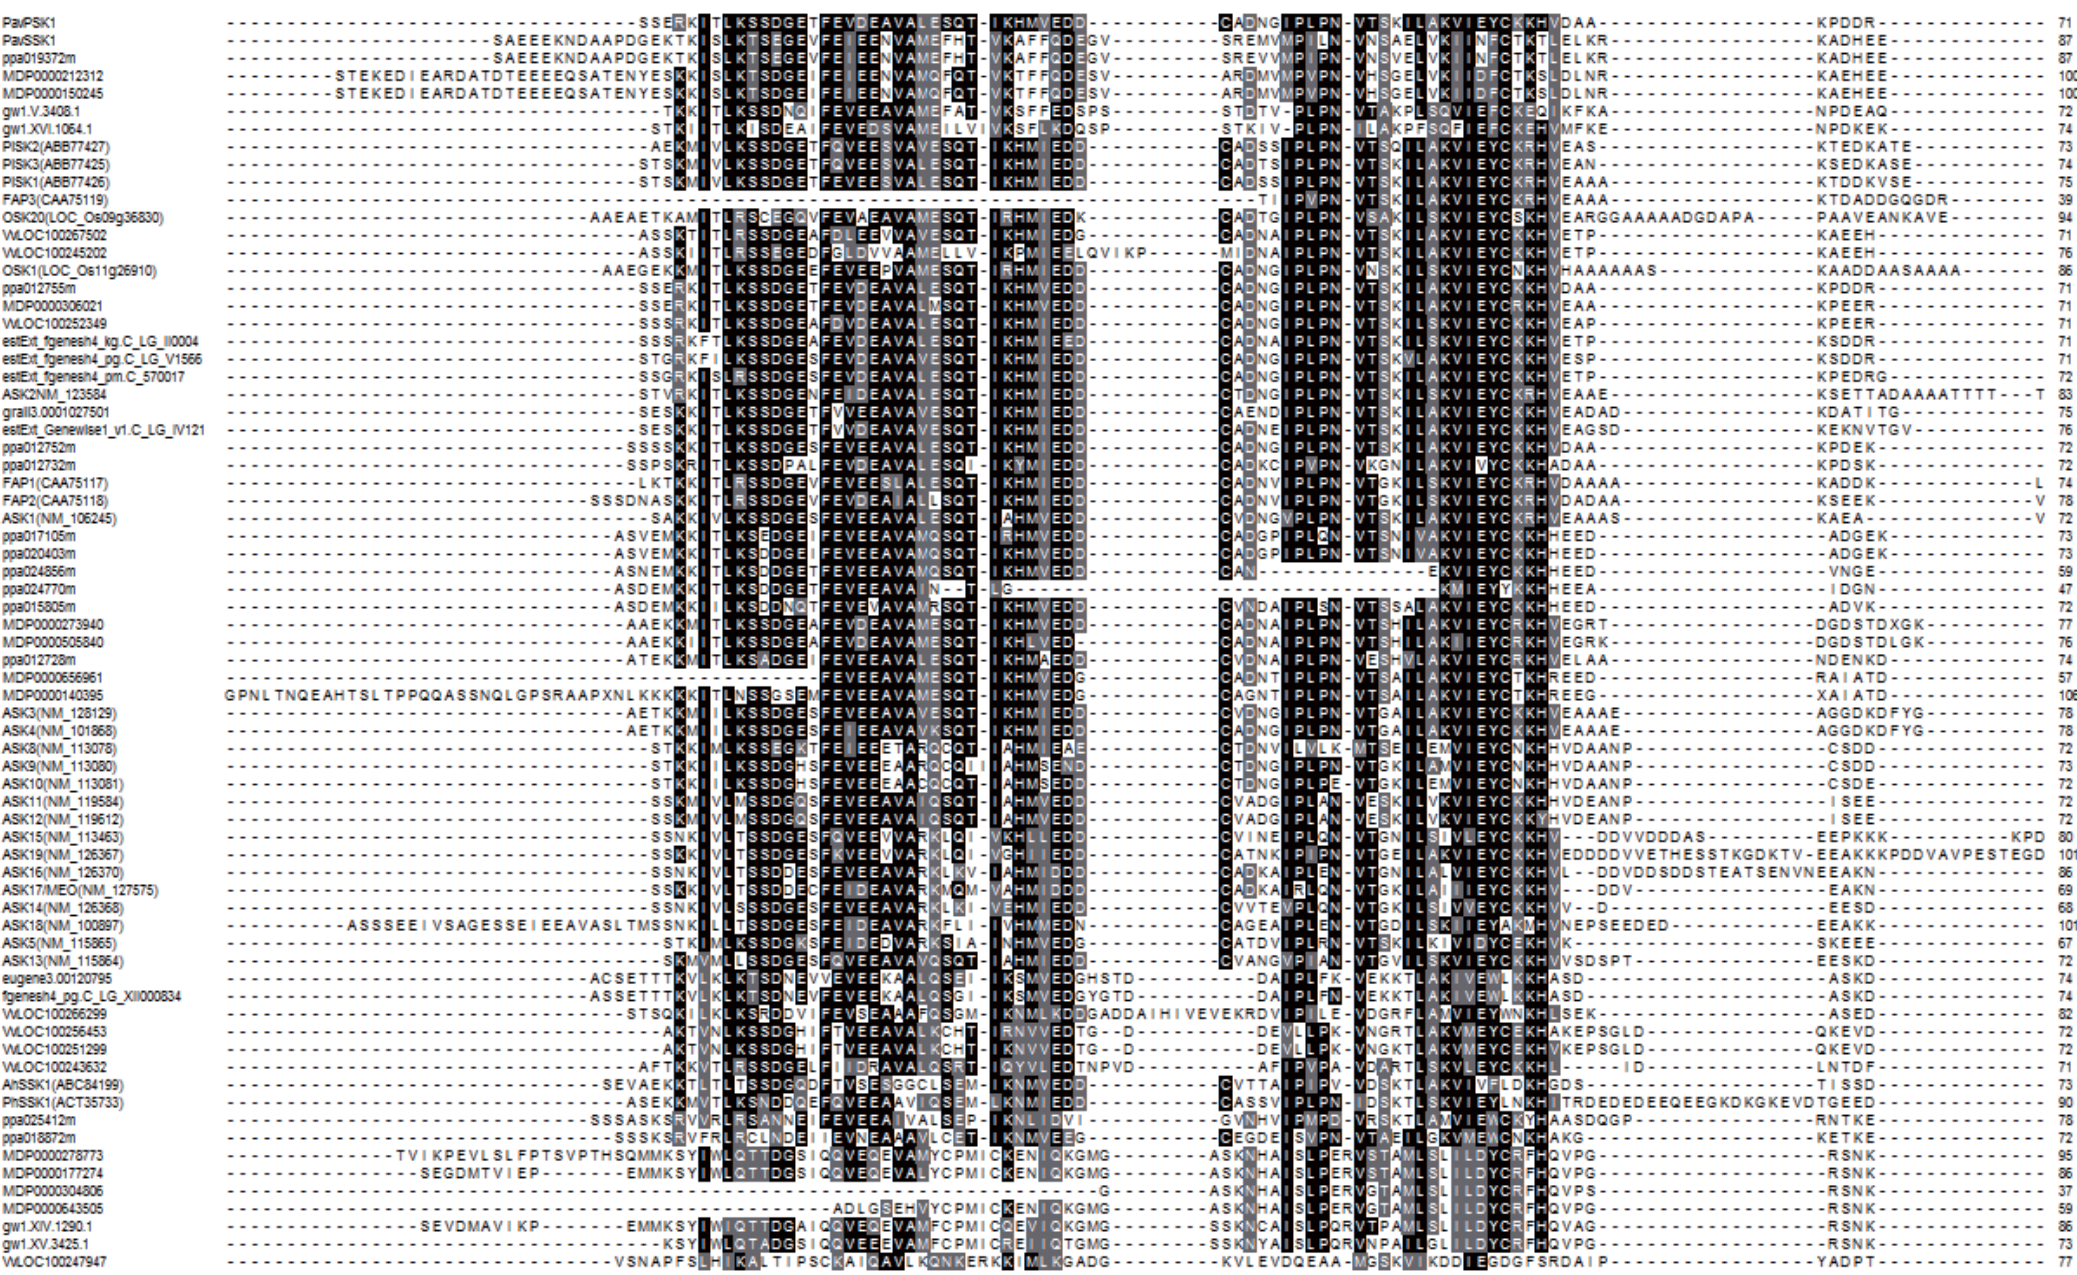

Supplementary Figure S1: Alignment of PavSSK1 and other plant Skp1-like proteins.

# Supplementary Figure S1 (2)

|                                |     |       |        |     |      |     |        |      |          |      |      |         |         |         |      |         |         |      |         |         |         |         |         |         |        |        |            |         |            |        |       |     |     |
|--------------------------------|-----|-------|--------|-----|------|-----|--------|------|----------|------|------|---------|---------|---------|------|---------|---------|------|---------|---------|---------|---------|---------|---------|--------|--------|------------|---------|------------|--------|-------|-----|-----|
| PavPSK1                        | --- | PSNDE | DLKAWD | TFD | FDV  | --- | IQA    | TLFD | LLAANYLN | IKS  | LLDL | TCCQ    | TV      | ---     | ADM  | IKGKT   | PEEIR   | TFNI | KNOFT   | PEEE    | ---     | EVRREN  | QWAFE   | ---     | 155    |        |            |         |            |        |       |     |     |
| PavSK1                         | --- | NAKKE | RLRF   | FYK | DFVK | --- | DETEH  | WELI | LAADYLH  | VDQL | LEVL | NQCV    | ---     | ---     | ADR  | IKKSV   | VEYR    | KFG  | ENDFT   | PEEE    | ---     | KLRBEY  | AWAFE   | GVDEE   | ---    | 176    |            |         |            |        |       |     |     |
| ppa019372m                     | --- | NAKKE | RLRF   | FYK | DFVK | --- | DETEH  | WELI | LAADYLH  | VDQL | LEVL | NQCV    | ---     | ---     | ADR  | IKKSV   | VEYR    | KFG  | ENDFT   | PEEE    | ---     | KLRBEY  | AWAFE   | GVDEE   | ---    | 176    |            |         |            |        |       |     |     |
| MDP0000212312                  | --- | VSKKE | RLRF   | FYK | DFVK | --- | DETTGN | WELT | LAADYLN  | VDQL | LEVL | NQCV    | ---     | ---     | ADR  | IKKSV   | VEYR    | KFG  | ENDFT   | PEEE    | ---     | KLRDQY  | AWAFE   | GVDEE   | ---    | 189    |            |         |            |        |       |     |     |
| MDP0000150245                  | --- | VSKKE | RLRF   | FYK | DFVK | --- | DETTGN | WELT | LAADYLN  | VDQL | LEVL | NQCV    | ---     | ---     | ADR  | IKKSV   | VEYR    | KFG  | ENDFT   | PEEE    | ---     | KLRDQY  | AWAFE   | GVDEE   | ---    | 189    |            |         |            |        |       |     |     |
| gw1.V.3408.1                   | --- | KKK   | ---    | HS  | EF   | FLK | ---    | EKS  | DKD      | LVDM | PV   | ANYL    | EIK     | LDL     | NL   | NAV     | ---     | ADR  | IKKSV   | VEYR    | SG      | FN      | KNOFT   | AEEA    | ---    | 151    |            |         |            |        |       |     |     |
| gw1.XV1.1064.1                 | --- | QKK   | ---    | I   | SE   | FLK | ---    | EKS  | NEE      | LD   | M    | V       | AKYL    | EAE     | D    | LDL     | SQA     | ---  | ADR     | IKKSV   | VEYR    | SG      | FN      | KNOFT   | PEEEA  | ---    | 153        |         |            |        |       |     |     |
| PISK2(AB877427)                | --- | DELKS | FD     | AD  | FVK  | --- | VD     | S    | M        | FD   | LL   | LAANYLN | IKS     | LLDL    | TCCQ | TV      | ---     | ADM  | IKGKT   | PEEIR   | TFNI    | KNOFT   | PEEE    | ---     | EVRREN | QWAFE  | ---        | 153     |            |        |       |     |     |
| PISK3(AB877426)                | --- | DELKS | FD     | AD  | FVK  | --- | VD     | Q    | G        | TL   | FD   | LL      | LAANYLN | IKS     | LLDL | TCCQ    | TV      | ---  | ADM     | IKGKT   | PEEIR   | TFNI    | KNOFT   | PEEE    | ---    | EVRREN | QWAFE      | ---     | 154        |        |       |     |     |
| PISK1(AB877426)                | --- | ED    | LK     | FD  | AD   | FVK | ---    | VD   | Q        | G    | TL   | FD      | LL      | LAANYLN | IKS  | LLDL    | TCCQ    | TV   | ---     | ADM     | IKGKT   | PEEIR   | TFNI    | KNOFT   | PEEE   | ---    | EVRREN     | QWAFE   | ---        | 155    |       |     |     |
| FAP3(CAA75119)                 | --- | DA    | LK     | FD  | AD   | FVK | ---    | VD   | Q        | G    | TL   | FD      | LL      | LAANYLN | IKS  | LLDL    | TCCQ    | TV   | ---     | ADM     | IKGKT   | PEEIR   | TFNI    | KNOFT   | PEEE   | ---    | EVRREN     | QWAFE   | ---        | 119    |       |     |     |
| OSK20(LOC_Os09g36830)          | --- | DEL   | K      | FD  | AD   | FVK | ---    | VD   | Q        | G    | TL   | FD      | LL      | LAANYLN | IKS  | LLDL    | TCCQ    | TV   | ---     | ADM     | IKGKT   | PEEIR   | TFNI    | KNOFT   | PEEE   | ---    | EVRREN     | QWAFE   | ---        | 174    |       |     |     |
| VL0C100267502                  | --- | A     | VN     | DE  | LK   | AWD | AD     | FVK  | ---      | VD   | Q    | A       | TL      | FD      | LL   | LAANYLN | IKS     | LLDL | TCCQ    | TV      | ---     | ADM     | IKGKT   | PEEIR   | TFNI   | KNOFT  | PEEE       | ---     | 154        |        |       |     |     |
| VL0C100245202                  | --- | A     | VN     | DE  | LK   | AWD | AD     | FVK  | ---      | VD   | Q    | A       | TL      | FD      | LL   | LAANYLN | IKS     | LLDL | TCCQ    | TV      | ---     | ADM     | IKGKT   | PEEIR   | TFNI   | KNOFT  | PEEE       | ---     | 159        |        |       |     |     |
| OSK1(LOC_Os11g26910)           | --- | V     | P      | P   | S    | G   | E      | L    | K        | W    | D    | A       | AD      | FVK     | ---  | VD      | Q       | A    | TL      | FD      | LL      | LAANYLN | IKS     | LLDL    | TCCQ   | TV     | ---        | EVRREN  | QWAFE      | ---    | 172   |     |     |
| ppa012755m                     | --- | PSNDE | DLKAWD | TFD | FDV  | --- | IQA    | TLFD | LLAANYLN | IKS  | LLDL | TCCQ    | TV      | ---     | ADM  | IKGKT   | PEEIR   | TFNI | KNOFT   | PEEE    | ---     | EVRREN  | QWAFE   | ---     | 155    |        |            |         |            |        |       |     |     |
| MDP0000306021                  | --- | ASVDE | DLKAWD | TFD | FDV  | --- | VD     | Q    | A        | TL   | FD   | LL      | LAANYLN | IKS     | LLDL | TCCQ    | TV      | ---  | ADM     | IKGKT   | PEEIR   | TFNI    | KNOFT   | PEEE    | ---    | EVRREN | QWAFE      | ---     | 155        |        |       |     |     |
| VL0C100252349                  | --- | SGVDE | DLKAWD | TFD | FDV  | --- | VD     | Q    | A        | TL   | FD   | LL      | LAANYLN | IKS     | LLDL | TCCQ    | TV      | ---  | ADM     | IKGKT   | PEEIR   | TFNI    | KNOFT   | PEEE    | ---    | EVRREN | QWAFE      | ---     | 155        |        |       |     |     |
| esiEht_fgenseh4_hg_C_LG_10004  | --- | PSS   | A      | D   | D    | L   | K      | W    | D        | A    | AD   | FVK     | ---     | VD      | Q    | A       | TL      | FD   | LL      | LAANYLN | IKS     | LLDL    | TCCQ    | TV      | ---    | EVRREN | QWAFE      | ---     | 156        |        |       |     |     |
| esiEht_fgenseh4_pg_C_LG_V1566  | --- | PSS   | A      | D   | D    | L   | K      | W    | D        | A    | AD   | FVK     | ---     | VD      | Q    | A       | TL      | FD   | LL      | LAANYLN | IKS     | LLDL    | TCCQ    | TV      | ---    | EVRREN | QWAFE      | ---     | 156        |        |       |     |     |
| esiEht_fgenseh4_pm_C_570017    | --- | T     | N      | S   | G    | D   | D      | L    | K        | W    | D    | A       | AD      | FVK     | ---  | VD      | Q       | A    | TL      | FD      | LL      | LAANYLN | IKS     | LLDL    | TCCQ   | TV     | ---        | EVRREN  | QWAFE      | ---    | 157   |     |     |
| ASK2NM_123584                  | --- | V     | A      | S   | G    | S   | D      | D    | L        | K    | W    | D       | A       | AD      | FVK  | ---     | VD      | Q    | A       | TL      | FD      | LL      | LAANYLN | IKS     | LLDL   | TCCQ   | TV         | ---     | EVRREN     | QWAFE  | ---   | 170 |     |
| grall3.0001027501              | --- | K     | D      | E   | F    | M   | S      | W    | D        | A    | AD   | FVK     | ---     | VD      | Q    | A       | TL      | FD   | LL      | LAANYLN | IKS     | LLDL    | TCCQ    | TV      | ---    | EVRREN | QWAFE      | ---     | 157        |        |       |     |     |
| esiEht_Genewise1_v1_C_LG_IV121 | --- | A     | E      | K   | D    | E   | S      | L    | K        | W    | D    | A       | AD      | FVK     | ---  | VD      | Q       | A    | TL      | FD      | LL      | LAANYLN | IKS     | LLDL    | TCCQ   | TV     | ---        | EVRREN  | QWAFE      | ---    | 160   |     |     |
| ppa012752m                     | --- | I     | S      | E   | D    | L   | K      | W    | D        | A    | AD   | FVK     | ---     | VD      | Q    | A       | TL      | FD   | LL      | LAANYLN | IKS     | LLDL    | TCCQ    | TV      | ---    | EVRREN | QWAFE      | ---     | 155        |        |       |     |     |
| ppa012732m                     | --- | I     | T      | E   | D    | L   | K      | W    | D        | A    | AD   | FVK     | ---     | VD      | Q    | A       | TL      | FD   | LL      | LAANYLN | IKS     | LLDL    | TCCQ    | TV      | ---    | EVRREN | QWAFE      | ---     | 156        |        |       |     |     |
| FAP1(CAA75117)                 | --- | A     | S      | T   | G    | T   | S      | D    | D        | L    | K    | W       | D       | A       | AD   | FVK     | ---     | VD   | Q       | A       | TL      | FD      | LL      | LAANYLN | IKS    | LLDL   | TCCQ       | TV      | ---        | EVRREN | QWAFE | --- | 161 |
| FAP2(CAA75118)                 | --- | A     | A      | A   | A    | G   | D      | D    | L        | K    | W    | D       | A       | AD      | FVK  | ---     | VD      | Q    | A       | TL      | FD      | LL      | LAANYLN | IKS     | LLDL   | TCCQ   | TV         | ---     | EVRREN     | QWAFE  | ---   | 165 |     |
| ASK1(NM_106245)                | --- | E     | G      | A   | A    | T   | S      | D    | D        | L    | K    | W       | D       | A       | AD   | FVK     | ---     | VD   | Q       | A       | TL      | FD      | LL      | LAANYLN | IKS    | LLDL   | TCCQ       | TV      | ---        | EVRREN | QWAFE | --- | 159 |
| ppa017105m                     | --- | N     | K      | E   | D    | L   | K      | W    | D        | A    | AD   | FVK     | ---     | VD      | Q    | A       | TL      | FD   | LL      | LAANYLN | IKS     | LLDL    | TCCQ    | TV      | ---    | EVRREN | QWAFE      | ---     | 155        |        |       |     |     |
| ppa020403m                     | --- | N     | K      | E   | D    | L   | K      | W    | D        | A    | AD   | FVK     | ---     | VD      | Q    | A       | TL      | FD   | LL      | LAANYLN | IKS     | LLDL    | TCCQ    | TV      | ---    | EVRREN | QWAFE      | ---     | 155        |        |       |     |     |
| ppa024856m                     | --- | N     | K      | V   | D    | L   | K      | W    | D        | A    | AD   | FVK     | ---     | VD      | Q    | A       | TL      | FD   | LL      | LAANYLN | IKS     | LLDL    | TCCQ    | TV      | ---    | EVRREN | QWAFE      | ---     | 140        |        |       |     |     |
| ppa024770m                     | --- | N     | K      | V   | D    | L   | K      | W    | D        | A    | AD   | FVK     | ---     | VD      | Q    | A       | TL      | FD   | LL      | LAANYLN | IKS     | LLDL    | TCCQ    | TV      | ---    | EVRREN | QWAFE      | ---     | 140        |        |       |     |     |
| ppa015805m                     | --- | N     | K      | E   | S    | L   | K      | W    | D        | A    | AD   | FVK     | ---     | VD      | Q    | A       | TL      | FD   | LL      | LAANYLN | IKS     | LLDL    | TCCQ    | TV      | ---    | EVRREN | QWAFE      | ---     | 122        |        |       |     |     |
| MDP0000273940                  | --- | I     | G      | D   | E    | X   | T      | L    | K        | W    | D    | A       | AD      | FVK     | ---  | VD      | Q       | A    | TL      | FD      | LL      | LAANYLN | IKS     | LLDL    | TCCQ   | TV     | ---        | EVRREN  | QWAFE      | ---    | 164   |     |     |
| MDP0000505840                  | --- | S     | G      | D   | E    | X   | T      | L    | K        | W    | D    | A       | AD      | FVK     | ---  | VD      | Q       | A    | TL      | FD      | LL      | LAANYLN | IKS     | LLDL    | TCCQ   | TV     | ---        | EVRREN  | QWAFE      | ---    | 162   |     |     |
| ppa012729m                     | --- | T     | K      | E   | F    | M   | S      | W    | D        | A    | AD   | FVK     | ---     | VD      | Q    | A       | TL      | FD   | LL      | LAANYLN | IKS     | LLDL    | TCCQ    | TV      | ---    | EVRREN | QWAFE      | ---     | 156        |        |       |     |     |
| MDP0000656961                  | --- | N     | E      | N   | N    | F   | K      | W    | D        | A    | AD   | FVK     | ---     | VD      | Q    | A       | TL      | FD   | LL      | LAANYLN | IKS     | LLDL    | TCCQ    | TV      | ---    | EVRREN | QWAFE      | ---     | 134        |        |       |     |     |
| MDP0000140395                  | --- | X     | E      | N   | N    | F   | K      | W    | D        | A    | AD   | FVK     | ---     | VD      | Q    | A       | TL      | FD   | LL      | LAANYLN | IKS     | LLDL    | TCCQ    | TV      | ---    | EVRREN | QWAFE      | ---     | 134        |        |       |     |     |
| ASK3(NM_128129)                | --- | S     | T      | E   | N    | H   | E      | L    | K        | W    | D    | A       | AD      | FVK     | ---  | VD      | Q       | A    | TL      | FD      | LL      | LAANYLN | IKS     | LLDL    | TCCQ   | TV     | ---        | EVRREN  | QWAFE      | ---    | 162   |     |     |
| ASK4(NM_101868)                | --- | S     | A      | E   | N    | D   | L      | K    | W        | D    | A    | AD      | FVK     | ---     | VD   | Q       | A       | TL   | FD      | LL      | LAANYLN | IKS     | LLDL    | TCCQ    | TV     | ---    | EVRREN     | QWAFE   | ---        | 162    |       |     |     |
| ASK8(NM_113078)                | --- | D     | L      | K   | W    | D   | A      | AD   | FVK      | ---  | VD   | Q       | A       | TL      | FD   | LL      | LAANYLN | IKS  | LLDL    | TCCQ    | TV      | ---     | EVRREN  | QWAFE   | ---    | 151    |            |         |            |        |       |     |     |
| ASK9(NM_113080)                | --- | D     | L      | K   | W    | D   | A      | AD   | FVK      | ---  | VD   | Q       | A       | TL      | FD   | LL      | LAANYLN | IKS  | LLDL    | TCCQ    | TV      | ---     | EVRREN  | QWAFE   | ---    | 152    |            |         |            |        |       |     |     |
| ASK10(NM_113081)               | --- | D     | L      | K   | W    | D   | A      | AD   | FVK      | ---  | VD   | Q       | A       | TL      | FD   | LL      | LAANYLN | IKS  | LLDL    | TCCQ    | TV      | ---     | EVRREN  | QWAFE   | ---    | 151    |            |         |            |        |       |     |     |
| ASK11(NM_119584)               | --- | D     | L      | N   | W    | D   | A      | AD   | FVK      | ---  | VD   | Q       | A       | TL      | FD   | LL      | LAANYLN | IKS  | LLDL    | TCCQ    | TV      | ---     | EVRREN  | QWAFE   | ---    | 151    |            |         |            |        |       |     |     |
| ASK12(NM_119612)               | --- | D     | L      | N   | W    | D   | A      | AD   | FVK      | ---  | VD   | Q       | A       | TL      | FD   | LL      | LAANYLN | IKS  | LLDL    | TCCQ    | TV      | ---     | EVRREN  | QWAFE   | ---    | 151    |            |         |            |        |       |     |     |
| ASK15(NM_113463)               | DEA | ---   | Q      | N   | D    | A   | W      | D    | A        | AD   | FVK  | ---     | VD      | Q       | A    | TL      | FD      | LL   | LAANYLN | IKS     | LLDL    | TCCQ    | TV      | ---     | EVRREN | QWAFE  | ADTKHEDPKP | ---     | 176        |        |       |     |     |
| ASK19(NM_126367)               | DEA | E     | D      | K   | K    | E   | L      | N    | W        | D    | A    | AD      | FVK     | ---     | VD   | Q       | A       | TL   | FD      | LL      | LAANYLN | IKS     | LLDL    | TCCQ    | TV     | ---    | EVRREN     | QWAFE   | QDQKQVQPKP | ---    | 199   |     |     |
| ASK16(NM_126370)               | --- | E     | F      | T   | W    | D   | A      | AD   | FVK      | ---  | VD   | Q       | A       | TL      | FD   | LL      | LAANYLN | IKS  | LLDL    | TCCQ    | TV      | ---     | EVRREN  | QWAFE   | DLK    | ---    | 169        |         |            |        |       |     |     |
| ASK17/MEO(NM_127575)           | --- | E     | F      | T   | W    | D   | A      | AD   | FVK      | ---  | VD   | Q       | A       | TL      | FD   | LL      | LAANYLN | IKS  | LLDL    | TCCQ    | TV      | ---     | EVRREN  | QWAFE   | ---    | 149    |            |         |            |        |       |     |     |
| ASK14(NM_126366)               | --- | E     | F      | T   | W    | D   | A      | AD   | FVK      | ---  | VD   | Q       | A       | TL      | FD   | LL      | LAANYLN | IKS  | LLDL    | TCCQ    | TV      | ---     | EVRREN  | QWAFE   | ---    | 148    |            |         |            |        |       |     |     |
| ASK18(NM_100897)               | --- | N     | D      | S   | W    | A   | K      | E    | F        | M    | S    | W       | D       | A       | AD   | FVK     | ---     | VD   | Q       | A       | TL      | FD      | LL      | LAANYLN | IKS    | LLDL   | TCCQ       | TV      | ---        | EVRREN | QWAFE | --- | 182 |
| ASK5(NM_115865)                | --- | D     | L      | K   | W    | D   | A      | AD   | FVK      | ---  | VD   | Q       | A       | TL      | FD   | LL      | LAANYLN | IKS  | LLDL    | TCCQ    | TV      | ---     | EVRREN  | QWAFE   | ---    | 152    |            |         |            |        |       |     |     |
| ASK13(NM_115864)               | --- | E     | L      | K   | W    | D   | A      | AD   | FVK      | ---  | VD   | Q       | A       | TL      | FD   | LL      | LAANYLN | IKS  | LLDL    | TCCQ    | TV      | ---     | EVRREN  | QWAFE   | ---    | 153    |            |         |            |        |       |     |     |
| eugenes3.00120795              | --- | E     | L      | K   | W    | D   | A      | AD   | FVK      | ---  | VD   | Q       | A       | TL      | FD   | LL      | LAANYLN | IKS  | LLDL    | TCCQ    | TV      | ---     | EVRREN  | QWAFE   | ---    | 153    |            |         |            |        |       |     |     |
| fgenseh4_pg_C_LG_XII000834     | --- | E     | L      | K   | W    | D   | A      | AD   | FVK      | ---  | VD   | Q       | A       | TL      | FD   | LL      | LAANYLN | IKS  | LLDL    | TCCQ    | TV      | ---     | EVRREN  | QWAFE   | ---    | 154    |            |         |            |        |       |     |     |
| VL0C100266299                  | --- | E     | M      | K   | W    | D   | A      | AD   | FVK      | ---  | VD   | Q       | A       | TL      | FD   | LL      | LAANYLN | IKS  | LLDL    | TCCQ    | TV      | ---     | EVRREN  | QWAFE   | ---    | 161    |            |         |            |        |       |     |     |
| VL0C100256453                  | --- | E     | M      | K   | W    | D   | A      | AD   | FVK      | ---  | VD   | Q       | A       | TL      | FD   | LL      | LAANYLN | IKS  | LLDL    | TCCQ    | TV      | ---     | EVRREN  | QWAFE   | ---    | 151    |            |         |            |        |       |     |     |
| VL0C100251299                  | --- | E     | M      | K   | W    | D   | A      | AD   | FVK      | ---  | VD   | Q       | A       | TL      | FD   | LL      | LAANYLN | IKS  | LLDL    | TCCQ    | TV      | ---     | EVRREN  | QWAFE   | ---    | 151    |            |         |            |        |       |     |     |
| VL0C100243632                  | --- | D     | Y      | S   | E    | L   | K      | W    | D        | A    | AD   | FVK     | ---     | VD      | Q    | A       | TL      | FD   | LL      | LAANYLN | IKS     | LLDL    | TCCQ    | TV      | ---    | EVRREN | QWAFE      | ---     | 150        |        |       |     |     |
| AHSSK1(ABC84199)               | --- | D     | M      | K   | K    | F   | D      | E    | Y        | V    | T    | G       | ---     | VD      | Q    | A       | TL      | FD   | LL      | LAANYLN | IKS     | LLDL    | TCCQ    | TV      | ---    | EVRREN | QWAFE      | GLDPPDS | ---        | 160    |       |     |     |
| PHSSK1(ACT35733)               | --- | D     | L      | K   | E    | F   | D      | E    | Y        | V    | T    | G       | ---     | VD      | Q    | A       | TL      | FD   | LL      | LAANYLN | IKS     | LLDL    | TCCQ    | TV      | ---    | EVRREN | QWAFE      | ---     | 178        |        |       |     |     |
| ppa025412m                     | --- | L     | I      | K   | E    | W   | E      | E    | L        | D    | C    | ---     | VD      | Q       | A    | TL      | FD      | LL   | LAANYLN | IKS     | LLDL    | TCCQ    | TV      | ---     | EVRREN | QWAFE  | SGPEIDDTVN | ---     | 140        |        |       |     |     |
| ppa018872m                     | --- | E     | L      | K   | W    | D   | A      | AD   | FVK      | ---  | VD   | Q       | A       | TL      | FD   | LL      | LAANYLN |      |         |         |         |         |         |         |        |        |            |         |            |        |       |     |     |

# Supplementary Figure S2

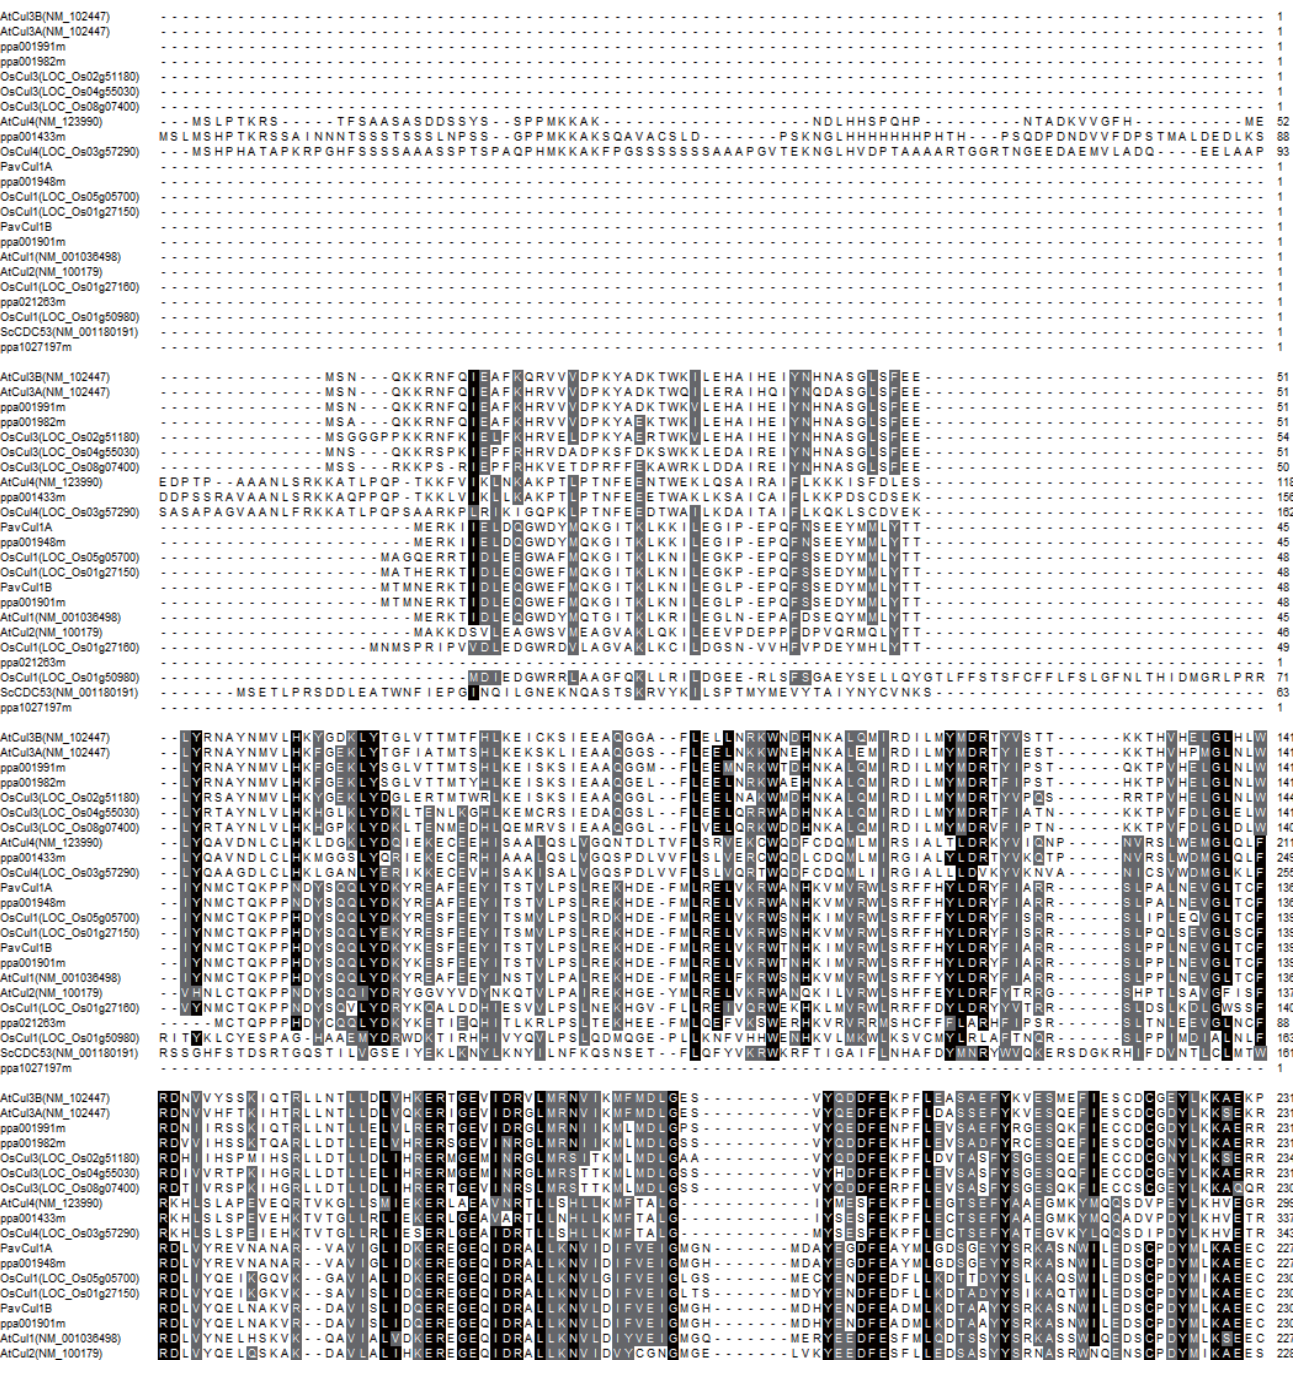

Supplementary Figure S2: Alignment of *Prunus* Cullin-likes and other plant Cullin-likes.
